# Supplementary material
Source: Springer Nature journal article supplement (https://www.springermedizin.de/resource/supplementary/12874_2012_1009_MOESM4_ESM.pdf/9433056)

# Registry Literature Review Flowchart

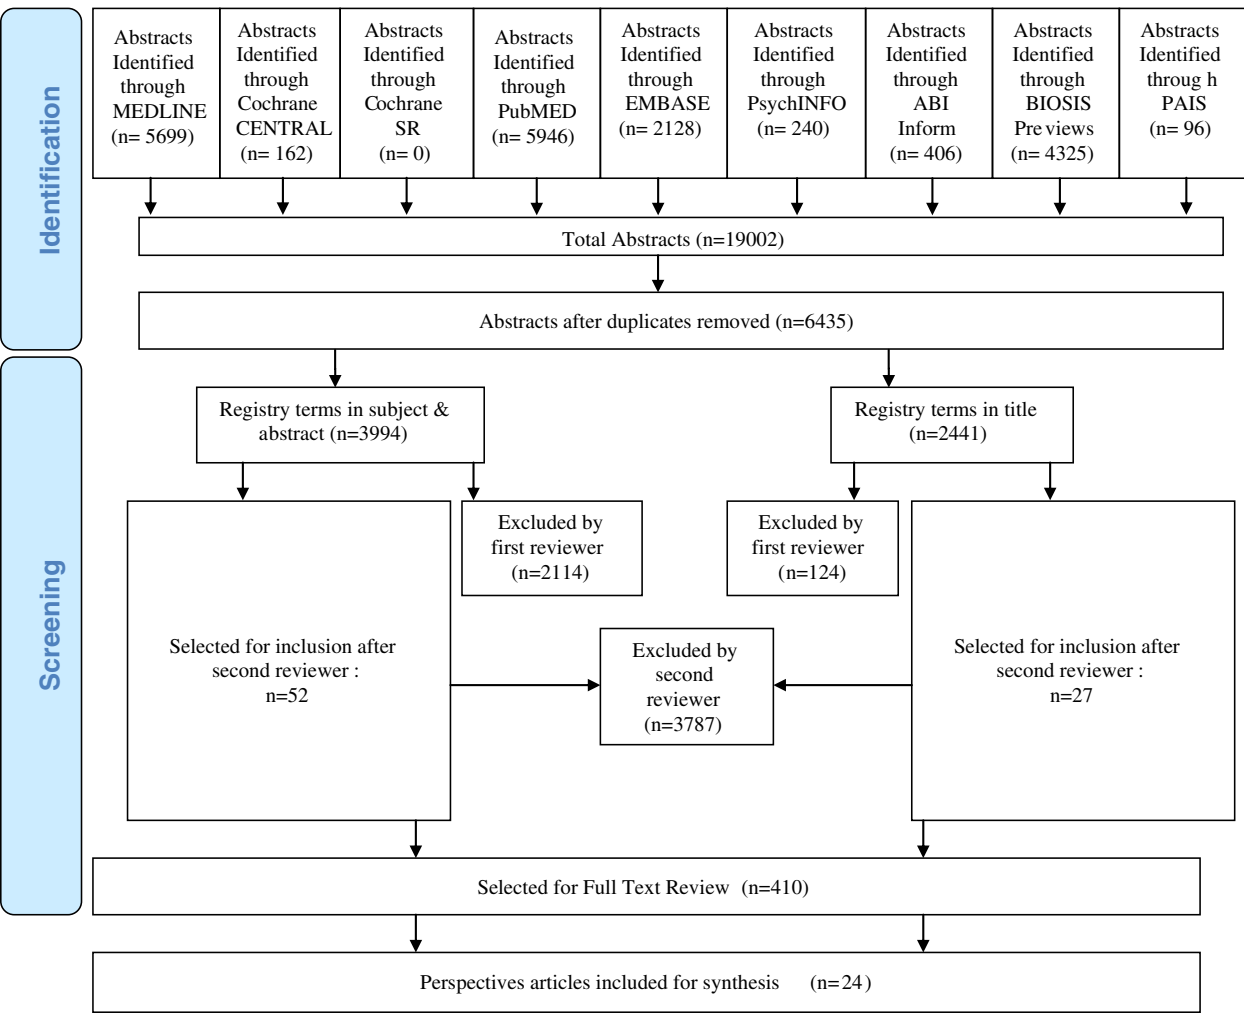

Supplement: MOESM4 [file 9433056]
